1 Article

2 **Correlation between serum 25(OH) vitamin D level**  
3 **and sleep quality in elderly patients with type 2**  
4 **diabetes**

5 **Hongyan Ma<sup>1,\*†</sup>, Danni Fan<sup>2</sup>, Xiaofei Li<sup>3</sup>, Ying Qi<sup>4</sup>, Yang Zhao<sup>5</sup>, Lin Zhang<sup>5,6,7†</sup>**

6 1. Department of Geriatrics, The First Affiliated Hospital of University of Science and Technology of China,  
7 Hefei 230001, China; (slyyhongyan816@126.com)

8 2. East Kent Hospitals University NHS Foundation Trust, Ethelbert Road, Canterbury Kent, CT1 3NG,  
9 England (Danni.fan@nhs.net)

10 3. The Second Clinical College of Guangzhou University of Chinese Medicine, Guangzhou, China  
11 (lxf13751726381@163.com)

12 4. School of Health Policy and Management, Chinese Academy of Medical Sciences & Peking Union Medical  
13 College, Beijing, China (yingqi@vip.126.com)

14 5. Melbourne School of Population and Global Health, The University of Melbourne, Victoria 3100,  
15 Australia. (xiyunjushi@163.com)

16 6. School of Population Medicine and Public Health, Chinese Academy of Medical Sciences and Peking  
17 Union Medical College, Beijing, 100021, China (Tony1982110@gmail.com)

18 7. Centre of Cancer Research, Victorian Comprehensive Cancer Centre, Melbourne, Victoria, Australia

19

20 \*Correspondence: Dr. Hongyan Ma, Email: slyyhongyan816@126.com

21 † These authors contributed equally to this work and should be considered co-first authors.

22 **Abstract:**

23 **Background:** Untreated sleep disorders have been linked with type 2 diabetes in previous evidence.

24 This study was to investigate the correlation between serum 25(OH) vitamin D level and sleep  
25 quality in elderly patients with type 2 diabetes and reveal the therapeutic potential of 25(OH)  
26 vitamin D-based treatments to improve sleeping quality and its effect on diabetes management.

27 **Methods:** The sleep quality of 186 elderly patients with type 2 diabetes were assessed by  
28 questionnaires of Pittsburgh sleep index (PSQI), with a cutoff point of PSQI • 7 defined as poor  
29 sleep. The measurement of serum 25(OH) vitamin D , fasting blood glucose, glycosylated  
30 hemoglobin, serum creatinine, total cholesterol, triglyceride, low-density lipoprotein cholesterol,  
31 and urinary albumin/creatinine ratio were collected. History of diabetic nephropathy, diabetic  
32 retinopathy, peripheral neuropathy, blood pressure, height, weight, hypoglycemic drug use, and  
33 the duration of diabetes also were recorded. Both univariate and multivariate logistic regression  
34 analysis was used to investigate the relationship of serum 25(OH) vitamin D and sleep quality in  
35 elderly patients with type 2 diabetes.

36 **Results:** The age of elderly patients with type 2 diabetes was 73.6±4.3 years., and duration of  
37 diabetes was 8.8 ± 3.0 years. In the study, inadequate quality of sleep was reported in 63% elderly  
38 patients with type 2 diabetes. This study revealed that lower level of 25(OH) vitamin D was  
39 significantly associated with poor sleep quality in type 2 diabetes patients(P < 0.05). Multivariate  
40 logistic regression analysis showed that 25(OH) vitamin D deficiency and the use of insulin were  
41 risk factors for of inadequate sleep quality in elderly patients with type 2 diabetes.

42 **Conclusions:** Elderly type 2 diabetic patients with 25(OH) vitamin D deficiency showed a high  
43 incidence of poor sleep quality, low-level of 25(OH) vitamin D was a risk factor for inadequate  
44 quality of sleep in elderly patients with type 2 diabetes.

45 **Keywords:** type 2 diabetes; sleep quality; 25(OH) vitamin D; elderly

## 46 1. Introduction

47 Type 2 diabetes is a chronic endocrine ailment, its prevalence rate continues to rise because of  
48 the change of lifestyle and is as high as 10% China and India<sup>1</sup>. Type 2 diabetes is estimated that  
49 around 60 million in Europe had type 2 diabetes by 2017 and would cause serious cardiovascular  
50 effects<sup>2</sup>. Type 2 diabetes and sleep disorders both are common health problems and affect each  
51 other. Persons with diabetes suffered from sleep disorders and took more sleeping medications<sup>3,4</sup>.  
52 According to latest statistics, more than 30% of adults suffer from sleep disorders, and the incidence  
53 of sleep disorders in the elderly over 60 years old is up to 40%<sup>5,6</sup>. Type 2 diabetes has shown to be  
54 associated with higher incidence of sleep disorders. Sleep disorders might be caused by the disease  
55 itself or by complications of the disease, such as peripheral neuropathy and polyuria.

56 25(OH) vitamin D is essential for good bone health and deficiency or insufficiency have also  
57 been linked to other health concerns, such as diabetes, cardiovascular disease, hypertension, tumor  
58 and autoimmune diseases<sup>7</sup>. The prevalence of Vitamin D deficiency has increased in recent  
59 decades.<sup>8,9</sup> In a recent population-based study of Asian adults, approximately 75% had suboptimal  
60 Vitamin D concentrations.<sup>10</sup> The Endocrine Society Clinical Practice Guideline defines Vitamin D  
61 deficiency as 25(OH)D level <20 ng/mL and insufficiency as 21 to 29 ng/mL.<sup>11</sup> Some studies have  
62 linked deficient 25(OH) vitamin D to neuropsychological diseases such as sleep disorders<sup>12-14</sup>, which  
63 showed that 25(OH) vitamin D deficiency was associated with a higher risk of inadequate quality of  
64 sleep. Massa, Jennifer et al. found a significant trend that lower total serum 25(OH) vitamin D was  
65 associated with shorter sleep duration, and that men with the lowest total serum 25(OH) vitamin  
66 D(< 20.3 ng/mL) were twice as likely to have a shorter sleep duration than those with the highest  
67 total serum 25(OH) vitamin D (•40.06 ng/mL). Some researchers believed that the neural systems  
68 that control the opposing states of arousal and sleep are predominantly confined to the brainstem,  
69 hypothalamus and the thalamus. It has been shown that 25(OH) vitamin D target neurons are  
70 thought to be involved in sleep regulation<sup>15</sup>.

71 There was a statistical difference between 25(OH) vitamin D concentration in diabetic patients  
72 and the healthy subjects in the study by Mohammad Ali Bayani. et al. The results showed that the  
73 mean concentration of healthy women was higher than that 25(OH) vitamin D in diabetic women  
74 (27.03±10.28 ng/dl , 19.3±11.9 ng/dl , respectively) (P =0.0001)<sup>16</sup> Therefore, we may believe that  
75 25(OH) vitamin D is important for diabetic women. In addition, a study was been shown that  
76 25(OH) vitamin D affects sleep in people between the ages of 20 and 50. 25(OH) vitamin D  
77 supplementation can improve the sleep quality, reduce the sleep latency, prolong the sleep time,  
78 and improve the subjective sleep quality of patients with sleep disorders . However, there are still  
79 few studies on the effect of 25(OH) vitamin D on sleep quality in elderly patients with type 2  
80 diabetes<sup>17</sup>.

81 This study was designed to investigate the relationship between serum 25(OH) vitamin D levels  
82 and sleep quality in elderly patients with type 2 diabetes in China and to fill in the literature gap on  
83 this topic.

## 84 **2. Materials and Methods**

### 85 *2.1 Patients and definitions*

86 A total of 186 inpatients were selected, who were admitted in the Department of  
87 Endocrinology and Geriatric Medicine of the First Affiliated Hospital of the University of Science  
88 and Technology of China (USTC) from January 2019 to December 2019. All patients were over 60  
89 years old and diagnosed with type 2 diabetes according to the 1999 WHO Diabetes Diagnostic  
90 Criteria. Exclusion criteria : Patients with type 1 diabetes and other special types of diabetes; with  
91 type 2 diabetes-related acute complications; with thyroid and parathyroid function disorders; with  
92 cardiac insufficiency, hepatic and renal dysfunction, respiratory failure, malignant tumors, and  
93 other severe illness; with incorporative psychiatric illnesses, mental retardation and cognitive  
94 deficit; being treated with glucocorticoids, 25(OH) vitamin D, calcium and other drugs that may  
95 affect 25(OH) vitamin D levels in the past 3 months. Patient informed consents were obtained. All  
96 the data received Institutional Review Board (IRB) approval by the Ethics Committee.  
97

### 98 *2.2 Study design and Method*

#### 99 *2.2.1 Clinical data collection*

100 The age, blood pressure, height, body weight, the duration of type 2 diabetes patients,  
101 medications (including oral hypoglycemic drugs and insulin) of all patients were recorded. Body  
102 mass index (BMI) was calculated according in  $\text{kg}/\text{m}^2$ . All patients were subjected for fundus  
103 examination to identify diabetic retinopathy after mydriasis, excluding other causes of retinopathy  
104 and physical examination and nerve conduction velocity (NCV) examination to identify diabetic  
105 peripheral neuropathy, excluding other neurological diseases and other causes of peripheral  
106 neuropathy. Venous fasting blood was sampled including fasting blood glucose (FBG), glycosylated  
107 hemoglobin (HbA1c), serum creatinine (Cr), total cholesterol (TC), triacylglycerol (TG) and  
108 low-density lipoprotein (LDL-C) were measured. Urine albumin was assayed by  
109 immunoturbidimetry, and urine creatinine concentration was determined by benedict-behre  
110 creatinine colorimetry urine albumin/creatinine ratio (UACR) was calculated, and diabetic  
111 nephropathy was defined by an UACR of  $\geq 30\text{mg}/\text{g}$  .

#### 112 *2.2.2 Sleep quality assessment*

113 The Pittsburgh Sleep Quality Index (PSQI) was originally developed in 1989 to measure sleep  
114 quality for psychiatric research as well as clinical practice<sup>18</sup>. The index has since been used to assess  
115 sleep quality in patients suffering T2DM<sup>19</sup>. The PSQI scale was used to evaluate the sleep status of  
116 all subjects in the past 4 weeks. The questionnaire included 19 self-assessments and 5 other  
117 assessment items. Higher scores indicated worse sleep quality. The investigator made use of  
118 questionnaire adjustment method. The adjustment tables were independently completed by the  
119 study subjects. Those who could not be accomplished independently due to visual impairment, low  
120 cultural level, etc., were asked by the investigator according to the content of the scale and the  
121 answer results were truthfully recorded. Poor sleep quality was defined by a total PSQI score<sup>20</sup> of  
122  $>7$ .

123

## 124 2.3 Statistical analyses

125 Normal distribution was determined by the Kolmogorove-Smirnov test, and the data were  
126 expressed as mean  $\pm$  standard deviation. Group comparison was performed by t test. The data that  
127 did not meet the normal distribution was compared by the Mann-Whitney U test. Count data were  
128 reported in rates, and comparisons between groups were performed using the  $\chi^2$  test. Univariate  
129 logistic regression analysis was used to screen variables for selected research factors. Univariate  
130 analysis was performed with the presence of sleep disturbance as the dependent variable and  
131 gender, age, body mass index (BMI), duration of diabetes, systolic blood pressure, diastolic blood  
132 pressure, FBG, HbA1c, TG, TC, LDL-C, Cr, 25(OH) vitamin D , diabetic nephropathy, diabetic  
133 peripheral neuropathy, diabetic retinopathy, and insulin use as the independent variables.  
134 Multivariate logistic regression analysis was used to explore the influencing factors of sleep  
135 disorder in elderly patients with type 2 diabetes. All tests were two-tailed test. A P value of  $<0.05$   
136 indicated statistically significant. SPSS software version 22.0 (SPSS Inc. Chicago, IL, USA,) was used  
137 for statistical analysis of the data.

138

## 139 3. Results

### 140 3.1 Baseline characteristics of two groups according to sleep quality in the elderly patients with type 2 141 diabetes

142 186 type 2 diabetes elderly patients were recruited in the study with average age ( $73.6\pm 4.3$ )  
143 years and the average duration of diabetes ( $8.8\pm 3.0$ ) years. There were 68 cases with diabetic  
144 nephropathy, 62 cases with diabetic retinopathy, and 50 cases with diabetic peripheral neuropathy;  
145 100 cases were treated with insulin. According to the total PSQI score, 186 elderly patients with  
146 type 2 diabetes were divided into a normal sleep group (PSQI  $\leq 7$ ) and an inadequate sleep quality  
147 group (total PSQI score  $> 7$ ). 117 cases presented with poor sleep quality, accounting for 63% of all  
148 subjects under study. Compared with the normal sleep group, the inadequate sleep quality group  
149 had lower 25(OH) vitamin D level, higher HbA1c level, and a higher incidence of diabetic  
150 nephropathy and more insulin use ( $P<0.05$ ). The differences in gender, age, BMI, duration of  
151 diabetes, systolic blood pressure, diastolic blood pressure, FBG, TG, TC, LDL-C, and Cr levels in the  
152 two groups were not statistically significant (all  $P>0.05$ ). The results were showed in **Table 1**.

153

154 **Table 1** Baseline characteristics of two groups according to sleep quality in the elderly patients with type 2  
155 diabetes

|                                   | Normal sleep group<br>( n=69 ) | Inadequate sleep group<br>( n=117 ) | t ( • <sup>2</sup> ) | P     |
|-----------------------------------|--------------------------------|-------------------------------------|----------------------|-------|
| Sex (male/female)                 | 46/23                          | 76/41                               | 0.056                | 0.813 |
| Age (years)                       | 73.0±4.1                       | 73.9±4.3                            | -1.295               | 0.197 |
| BMI (kg/m <sup>2</sup> )          | 21.5±2.9                       | 21.3±3.4                            | 0.425                | 0.672 |
| Duration of diabetes (years)      | 8.6±2.8                        | 8.9±3.1                             | -0.623               | 0.534 |
| Systolic pressure (mmHg)          | 129.5±8.2                      | 131.9±8.2                           | -1.931               | 0.055 |
| Diastolic pressure (mmHg)         | 74.1±7.8                       | 76.0±7.9                            | -1.514               | 0.132 |
| FBG (mmol/L)                      | 7.24±1.9                       | 7.52±2.35                           | -0.855               | 0.393 |
| HbA1c (%)                         | 6.43±2.6                       | 7.35±2.69                           | -2.274               | 0.024 |
| TG (mmol/L)                       | 1.53±0.7                       | 1.67±0.67                           | -1.308               | 0.192 |
| TC (mmol/L)                       | 4.54±1.3                       | 4.92±1.68                           | -1.645               | 0.102 |
| LDL-C (mmol/L)                    | 3.87±0.9                       | 4.14±0.96                           | -1.824               | 0.07  |
| Cr (•mol/L)                       | 88.77±23.1                     | 92.42±29.2                          | -0.888               | 0.376 |
| 25(OH) vitamin D (ng/mL)          | 20.674±2.6                     | 13.131±2.9                          | 18.004               | <0.01 |
| Diabetic nephropath (%)           | 18 (26.1)                      | 50 (42.7)                           | 5.187                | 0.023 |
| Diabetic peripheral neuropath (%) | 16 (23.2)                      | 34 (29.1)                           | 0.761                | 0.383 |
| Diabetic retinopathy (%)          | 20 (29.0)                      | 42 (35.9)                           | 0.933                | 0.334 |
| Insulin use (%)                   | 25 (36.2)                      | 75 (64.1)                           | 13.563               | <0.01 |

156

157 *3.2 Comparison of sleep quality in different 25(OH) vitamin D level groups in elderly patients with type 2*  
158 *diabetes*

159 There were 141 cases presented with 25(OH) vitamin D deficiency, accounting for 76% of the  
160 186 elderly patients with type 2 diabetes recruited in this study. The average PSQI total score of the  
161 25(OH) vitamin D-deficient group was higher than that of the 25(OH) vitamin D -nondeficient  
162 group, and the difference was statistically significant (P <0.05); The scores of 25(OH) vitamin D  
163 deficient group were higher than those of normal 25(OH) vitamin D group (P <0.05) in 7  
164 dimensions of subjective sleep quality, sleep latency, sleep duration, habitual sleep efficiency, sleep  
165 disturbances, use of sleeping medication and daytime dysfunction (**Table 2**).

166

167 **Table 2** Comparison of sleep quality in two groups, which were divided based on vitamin D level in the  
168 elderly patients with type 2 diabetes

|                            | 25(OH) vitamin D<br>-nondeficient group<br>(n=45) | 25(OH) vitamin D<br>-deficient group<br>(n=141) | Z ( •2 ) | P     |
|----------------------------|---------------------------------------------------|-------------------------------------------------|----------|-------|
| Sex (male/female)          | 31/14                                             | 91/50                                           | 0.286    | 0.593 |
| PSQI total score           | 6.69±1.4                                          | 10.6±1.9                                        | -9.190   | <0.01 |
| Subjective sleep quality   | 1.47±0.84                                         | 1.81±0.88                                       | -2.329   | 0.02  |
| Sleep latency              | 0.96±0.77                                         | 1.54±0.94                                       | -3.664   | <0.01 |
| Sleep duration             | 0.98±0.15                                         | 1.28±0.83                                       | -2.565   | <0.01 |
| Habitual sleep efficiency  | 0.91±0.56                                         | 1.46±0.64                                       | -4.903   | <0.01 |
| Sleep disturbances         | 0.89±0.32                                         | 1.65±0.49                                       | -7.856   | <0.01 |
| Use of sleeping medication | 0.38±0.49                                         | 0.70±0.46                                       | -3.900   | <0.01 |
| Daytime dysfunction        | 0.86±0.34                                         | 2.15±0.90                                       | -7.995   | <0.01 |

169

### 170 3.3 Logistic regression analysis of risk factors for sleep disorders in elderly patients with type 2 diabetes

171 The results showed diabetic nephropathy, HbA1c, 25(OH) vitamin D, use of insulin were  
172 related to the occurrence of inadequate quality of sleep in patients. Multivariate logistic regression  
173 analysis of the above indicators suggested that 25(OH) vitamin D deficiency and the use of insulin  
174 were risk factors for of inadequate sleep quality in elderly patients with type 2 diabetes. (**Table 3**)

175 **Table 3.** logistic analysis of sleep quality risk factors in elderly patients with type 2 diabetes

| Risk factors     | Exp(B) | 95% CI      | P     |
|------------------|--------|-------------|-------|
| 25(OH) vitamin D | 0.21   | 0.11- 0.41  | <0.01 |
| Use of Insulin * | 28.68  | 2.54-323.54 | <0.01 |

176

\* Use of insulin , no = 0 , yes = 1

## 177 4. Discussion

178 In this study, we revealed the correlation between serum 25(OH) vitamin D deficiency and  
179 sleep quality in elderly patients with type 2 diabetes.

180 Sleep plays an important role in human health, and sleep disorders is closely related to  
181 diabetes<sup>21</sup>. In recent years, sleep disorders have been taken into account as an important risk factor  
182 for the development of type 2 diabetes in the elderly. Sleep disorders and depression are more  
183 prevalent in people with type 2 diabetes. Van Dijk et al. reported in the study that the probability of  
184 increased nocturnal enuresis, pain, dysthernesthesia, and habitual snoring in diabetic populations  
185 were significantly increased<sup>22</sup>. Epidemiological studies found that the incidence of sleep disorders  
186 in people with type 2 diabetes was 45% to 55%<sup>23,24</sup>. This study showed the prevalence of inadequate  
187 sleep quality, which is only a subset of all various sleep disorders, was high up to 63% in elderly  
188 patients with type 2 diabetes. This indicated the incidence of sleep disorders would be significantly  
189 higher in elderly patients among all type 2 diabetic patients<sup>5</sup>.

190 Inadequate sleep quality could cause sympathetic nerve excitement, increase the secretion of  
191 antagonist hormone of insulin such as nighttime growth hormone, glucagon, catecholamine, and  
192 cortisol, disturb glucose homeostasis; and increase insulin resistance<sup>25</sup>. One has shown One study  
193 also showed that long-term sleep deprivation could reduce insulin secretion in the body leading to  
194 increased blood glucose levels in patients with diabetes<sup>26</sup>. This study also found that HbA1c levels  
195 in diabetic patients with sleep disorders were higher than those in the normal sleep group,  
196 indicating that blood glucose in the sleep disorder group was more difficult to control.

197 Since serum 25(OH) vitamin D concentration is affected by many factors, including sun  
198 exposure, lifestyle, and skin tone, etc. 25(OH) vitamin D deficiency has become a worldwide  
199 problem and the prevalence is rising<sup>27</sup>. Bayani et al. found that compared with healthy controls,  
200 serum 25(OH) vitamin D levels were significantly lower in patients with type 2 diabetes, and the  
201 decline was more pronounced in women<sup>28</sup>. This study also showed that 25(OH) vitamin D  
202 deficiency was prevalent in elderly people with type 2 diabetes, accounting for 76% of the study  
203 population. The potential causes of low 25(OH) vitamin D in elderly patients could be less outdoor  
204 activities, shorter sunshine hours, and reduced gastrointestinal digestion and absorption in elderly  
205 patients.

206 The data in this study show that in elderly patients with type 2 diabetes, the serum 25(OH)  
207 vitamin D level in the sleep disorders group was lower than that in the normal sleep group, and the  
208 insulin use rate was higher than in the normal sleep group. The average total PSQI score of the  
209 25(OH) vitamin D -deficient group was higher than those of the normal vitamin D group, and the  
210 25(OH) vitamin D -deficient group scored higher in 7 dimensions of subjective sleep quality, sleep  
211 latency, sleep duration, habitual sleep efficiency, sleep disturbances, use of sleeping medication and  
212 daytime dysfunction. Further logistic regression analysis showed that low level of 25(OH) vitamin  
213 D and more insulin use were associated with sleep disturbance in elderly patients with type 2  
214 diabetes. Logistic regression analysis of risk factors for sleep disorders in elderly patients with type  
215 2 diabetes demonstrated that the low-level serum 25(OH) vitamin D was an important risk factor  
216 for inadequate quality of sleep in elderly patients with type 2 diabetes.

217 Knhanes result showed that lower serum 25(OH) vitamin D levels were linked to a  
218 significantly higher risk of short sleep duration<sup>29,30</sup>. McCarty et al. found that patients with 25(OH)  
219 vitamin D deficiency scored lower on the Epworth sleepiness scale (ESSs)<sup>31</sup>. Another study  
220 measured objective sleep duration and sleep effectiveness of men over the age of 65 and found that  
221 lower serum 25(OH) vitamin D levels were associated with shorter sleep duration and poorer sleep  
222 effectiveness<sup>32</sup>. These results mentioned above were consistent with our data.

223 So far, the mechanisms for a link between sleep duration and 25(OH) vitamin D were not  
224 clearly understood. Vitamin D receptors (VDR) were shown to be present in nearly all tissues of the  
225 body, including many parts of the human brain, such as the hypothalamus, prefrontal cortex,  
226 midbrain central gray, and substantia nigra, etc., which all play an important role in sleep  
227 regulation<sup>32-34</sup>.

228 The classical clinical presentation of Vitamin D deficiency is bone pain. Increased pain could  
229 be associated with sleep disturbances<sup>35</sup>. Epidemiologic evidence for impact of 25(OH) vitamin D  
230 supplements on sleep quality was emerging. One study showed that people's pain levels, sleep  
231 quality, and various aspects of Quality of Life (QoL) can be significantly improved after  
232 standardized vitamin D supplementation<sup>36</sup>. Another double-blind clinical trial showed  
233 improvements and increases in sleep quality and duration in patients with sleep disorders after  
234 eight weeks of continuous supplementation with 25(OH) vitamin D (50,000 IU/ 2 weeks)<sup>17</sup>.

235 As far as we know, this was the first study to analyze the relationship between serum 25(OH)  
236 vitamin D concentration and sleep quality in elderly patients with type 2 diabetes. The significance  
237 of this study is that the concentration of 25(OH) vitamin D can be used to identify sleep disorders in  
238 elderly patients with type 2 diabetes. These findings have positive implications for the prevention  
239 and treatment of inadequate sleep quality in elderly patients with type 2 diabetes. One limitation of

240 this study was that the dietary habits and psychological state of patients were not assessed, which,  
241 may also be related to sleep quality. Further, because of the character of the cross-sectional study, we  
242 could not conclude the causal relationship among 25(OH) vitamin D and sleep quality. Therefore,  
243 further studies with larger scale cohort studies and well-designed randomized controlled trials  
244 would be needed to verify this relationship and reveal possible mechanisms.

## 245 **5 Conclusion**

246 In conclusion, this study confirms that 25(OH) vitamin D deficiency was more common in  
247 elderly type 2 diabetic patients. There was a clear correlation between vitamin D deficiency and  
248 sleep quality in this population. This initial work warrants further larger scale studies of ethnic  
249 25(OH) vitamin D variations and potential causal interrelationship between sleep quality, insulin  
250 usage and 25(OH) vitamin D deficiency state among elderly type 2 diabetic patients. Further studies  
251 are required to investigate possible biological mechanisms of the association between 25(OH)  
252 vitamin D deficiency, insulin usage and sleep quality, and to discover whether effective  
253 interventions for 25(OH) vitamin D supplementation could improve sleeping quality and  
254 effectiveness of insulin treatment in decrease the risk of geriatric syndromes in elders with type 2  
255 diabetes.

256 **Author Contributions:** Conceptualization, Hongyan Ma, Lin Zhang; Methodology, Hongyan Ma,  
257 Lin Zhang; Writing – original draft, Hongyan Ma, Dani Fan, Lin Zhang; Writing – review & editing,  
258 Hongyan Ma, Dani Fan, Xiaofei Li, Yang Zhao, Lin Zhang. All authors have read and agreed to the  
259 published version of the manuscript.

260 **Funding:** This research received no external funding.

261 **Acknowledgments:** This study was supported by the First Affiliated Hospital of University of  
262 Science and Technology of China for data access.

263 **Conflicts of Interest:** The authors declare no conflict of interest

264 **Ethical approval:** Informed consents of patients were obtained for diagnosis and treatment, and the  
265 study protocol was approved by the First Affiliated Hospital of University of Science and  
266 Technology of China. All the data received Institutional Review Board (IRB) approval by the Ethics  
267 Committee.

## 268 **References**

- 269
- 270 1. Gwatidzo SD, Stewart Williams J. Diabetes mellitus medication use and catastrophic healthcare expenditure  
271 among adults aged 50+ years in China and India: results from the WHO study on global AGEing and  
272 adult health (SAGE). *BMC Geriatrics* 2017;17(1) doi: 10.1186/s12877-016-0408-x
  - 273 2. Cho NH, Shaw JE, Karuranga S, et al. IDF Diabetes Atlas: Global estimates of diabetes prevalence for 2017  
274 and projections for 2045. *Diabetes Research & Clinical Practice* 2018:271.
  - 275 3. Skomro RP, Ludwig S, Salamon E, et al. Sleep complaints and restless legs syndrome in adult type 2  
276 diabetics. *Sleep Medicine* 2001;2(5):417-22.

- 277 4. Association AD. 3. Comprehensive Medical Evaluation and Assessment of Comorbidities: *Standards of*  
278 *Medical Care in Diabetes—2018*. *Diabetes Care* 2018;41(Suppl 1):S28.
- 279 5. Vittoria E, Sisti D, Pascucci P, et al. [Prevalence of Obstructive Sleep Apnea Syndrome among holders of a  
280 category B driver's license and among professionals in the Province of Pesaro-Urbino (Italy)]. *Igiene E*  
281 *Sanita Pubblica* 2017;73(6):605.
- 282 6. Owens, J. Insufficient Sleep in Adolescents and Young Adults: An Update on Causes and Consequences.  
283 *Pediatrics* 2014;134(3):e921.
- 284 7. Mayte M, Estrella CC, Isabel M, et al. Vitamin D: Effect on Haematopoiesis and Immune System and Clinical  
285 Applications. *International Journal of Molecular Sciences* 2018;19(9):2663-.
- 286 8. Holick MF, Chen TC. Vitamin D deficiency: a worldwide problem with health consequences. *The American*  
287 *journal of clinical nutrition* 2008;87(4):1080S-6S. doi: 10.1093/ajcn/87.4.1080S [published Online First:  
288 2008/04/11]
- 289 9. Hilger J, Friedel A, Herr R, et al. A systematic review of vitamin D status in populations worldwide. *Br J*  
290 *Nutr* 2014;111(1):23-45. doi: 10.1017/S0007114513001840 [published Online First: 2013/08/13]
- 291 10. Man RE, Li LJ, Cheng CY, et al. Prevalence and Determinants of Suboptimal Vitamin D Levels in a  
292 Multiethnic Asian Population. *Nutrients* 2017;9(3) doi: 10.3390/nu9030313 [published Online First:  
293 2017/03/23]
- 294 11. Holick MF, Binkley NC, Bischoff-Ferrari HA, et al. Evaluation, treatment, and prevention of vitamin D  
295 deficiency: an Endocrine Society clinical practice guideline. *J Clin Endocrinol Metab* 2011;96(7):1911-30.  
296 doi: 10.1210/jc.2011-0385 [published Online First: 2011/06/08]
- 297 12. Ewelina, ?ukaszzyk, Katarzyna, et al. Cognitive Functioning of Geriatric Patients: Is Hypovitaminosis D the  
298 Next Marker of Cognitive Dysfunction and Dementia? *Nutrients* 2018
- 299 13. Hiller AL, Murchison CF, Lobb BM, et al. A randomized, controlled pilot study of the effects of vitamin D  
300 supplementation on balance in Parkinson's disease: Does age matter? *PLoS ONE* 2018;13(9)
- 301 14. Pierrot-Deseilligny C, Souberbielle JC. Vitamin D and multiple sclerosis: An update. *Multiple Sclerosis &*  
302 *Related Disorders* 2017;14:35.
- 303 15. Gominak SC, Stumpf WE. The world epidemic of sleep disorders is linked to vitamin D deficiency. *Medical*  
304 *Hypotheses* 2012;79(2):132-35. doi: 10.1016/j.mehy.2012.03.031
- 305 16. Bayani. MA, . RA, . BB, et al. Status of Vitamin-D in diabetic patients. 2014;5(1):3. [published Online First:  
306 42]
- 307 17. Majid MS, Ahmad HS, Bizhan H, et al. The effect of vitamin D supplement on the score and quality of sleep  
308 in 20-50 year-old people with sleep disorders compared with control group. *Nutr Neurosci*  
309 2018;21(7):511-19. doi: 10.1080/1028415X.2017.1317395
- 310 18. Buysse DJ, Reynolds CF, 3rd, Monk TH, et al. The Pittsburgh Sleep Quality Index: a new instrument for  
311 psychiatric practice and research. *Psychiatry research* 1989;28(2):193-213. doi:  
312 10.1016/0165-1781(89)90047-4 [published Online First: 1989/05/01]
- 313 19. Telford O, Diamantidis CJ, Bosworth HB, et al. The relationship between Pittsburgh Sleep Quality Index  
314 subscales and diabetes control. *Chronic Illn* 2019;15(3):210-19. doi: 10.1177/1742395318759587  
315 [published Online First: 2018/02/23]
- 316 20. Liu HX, Lin J, Lin XH, et al. Quality of sleep and health-related quality of life in renal transplant recipients.  
317 *International Journal of Clinical & Experimental Medicine* 2015;8(9):16191-98.

- 318 21. Buxton OM, Marcelli E. Short and long sleep are positively associated with obesity, diabetes, hypertension,  
319 and cardiovascular disease among adults in the United States. *Social ence & Medicine*  
320 2010;71(5):1027-36.
- 321 22. Dijk MV, Donga E, Dijk JGV, et al. Disturbed subjective sleep characteristics in adult patients with  
322 long-standing Type 1 diabetes mellitus. *Diabetologia* 2011;54(8):1967-76.
- 323 23. Luyster FS, Dunbar-Jacob J. Sleep Quality and Quality of Life in Adults With Type 2 Diabetes. *Diabetes*  
324 *Educator* 2011;37(3):347-55.
- 325 24. Amarabalan, Rajendran, Shruthi, et al. Prevalence and correlates of disordered sleep in southeast asian  
326 indians with type 2 diabetes. *Diabetes & metabolism journal* 2012
- 327 25. P CF, Lanfranco DE, Pasquale S, et al. Quantity and quality of sleep and incidence of type 2 diabetes: a  
328 systematic review and meta-analysis.[J]. *Diabetes care*,2010,33(2). *Diabetes care* 2010;33(2) doi:  
329 10.2337/dc09-1124
- 330 26. Darukhanavala A, Booth JN, Bromley L, et al. Changes in Insulin Secretion and Action in Adults With  
331 Familial Risk for Type 2 Diabetes Who Curtail Their Sleep. *Diabetes Care* 2011;34(10):2259-64.
- 332 27. Norman AW, Bouillon R. Vitamin D nutritional policy needs a vision for the future. *Experimental Biology &*  
333 *Medicine* 2010;235(9):1034-45.
- 334 28. Bayani MA, Akbari R, Banasaz B, et al. Status of Vitamin-D in diabetic patients. *Caspian J Intern Med*  
335 2014;5(1):3. [published Online First: 42]
- 336 29. Lee HJ, Lee HD, Hwang HS, et al. Associations between Serum Vitamin D Level and Mean Hours of Sleep:  
337 2011Korea National Health and Nutrition Examination Survey. *Metabolism-Clinical and Experimental*  
338 2014;7(8):6346-61.
- 339 30. Kim JH, Chang JH, Kim DY, et al. Association between self-reported sleep duration and serum vitamin D  
340 level in elderly Korean adults. *Journal of the American Geriatrics Society* 2014;62(12):2327-32.
- 341 31. Mccarty DE, Reddy A, Keigley Q, et al. Vitamin D, Race, and Excessive Daytime Sleepiness. *Journal of*  
342 *Clinical Sleep Medicine Jcsm Official Publication of the American Academy of Sleep Medicine* 2012;8(6):693-7.
- 343 32. Massa J, Stone KL, Wei EK, et al. Vitamin D and Actigraphic Sleep Outcomes in Older  
344 Community-Dwelling Men: The MrOS Sleep Study. *Sleep* 2015;38(2):251-57. doi: 10.5665/sleep.4408
- 345 33. A EG, B WB, A MM, et al. New clues about vitamin D functions in the nervous system. *Trends in*  
346 *Endocrinology & Metabolism* 2002;13(3):100-05.
- 347 34. Musiol IM, Stumpf WE, Bidmon HJ, et al. Vitamin D nuclear binding to neurons of the septal, substriatal  
348 and amygdaloid area in the Siberian hamster (*Phodopus sungorus*) brain. *Neuroence* 1992;48(4):841-48.
- 349 35. Monika H, Elsa S, Mullington JM. Elevated inflammatory markers in response to prolonged sleep  
350 restriction are associated with increased pain experience in healthy volunteers. *Sleep* (9):1145.
- 351 36. Huang W, Shah S, Long Q, et al. Improvement of Pain, Sleep, and Quality of Life in Chronic Pain Patients  
352 With Vitamin D Supplementation. *Clinical Journal of Pain* 2013;29(4):341-47.  
353
